# Supplementary material for: Asymmetric niobium guanidinates as intermediates in the catalytic guanylation of amines
Source: Royal Society of Chemistry journal article supplement (doi:10.1039/c3dt50477h), 2013-01-01
Supplement: c3dt50477h_3.pdf [file c3dt50477h_3.pdf]

**Table S1.** Crystal Data and Structure Refinement for compounds **1a** and **3dH<sub>2</sub>**.

| Compound                                   | <b>1a</b>                                                         | <b>3dH<sub>2</sub></b>                                            |
|--------------------------------------------|-------------------------------------------------------------------|-------------------------------------------------------------------|
| Empirical formula                          | C <sub>31</sub> H <sub>42</sub> Br N <sub>4</sub> Nb              | C <sub>20</sub> H <sub>36</sub> N <sub>6</sub>                    |
| Temperature (K)                            | 260(2)                                                            | 300(2)                                                            |
| Wavelength (Å)                             | 0.71073                                                           | 0.71073                                                           |
| Cryst. Syst.                               | Monoclinic                                                        | Monoclinic                                                        |
| Space group                                | <i>P</i> 2 <sub>1</sub> / <i>c</i>                                | <i>P</i> 2 <sub>1</sub> / <i>c</i>                                |
| <i>a</i> (Å)                               | 11.992(1)                                                         | 9.648(1)                                                          |
| <i>b</i> (Å)                               | 18.927(2)                                                         | 16.467(1)                                                         |
| <i>c</i> (Å)                               | 15.034(2)                                                         | 8.442(1)                                                          |
| $\alpha$ (deg)                             | 90                                                                | 90                                                                |
| $\beta$ (deg)                              | 112.579(1)                                                        | 98.015(5)                                                         |
| $\gamma$ (deg)                             | 90                                                                | 90                                                                |
| Volume (Å <sup>3</sup> )                   | 3150.7(7)                                                         | 1328.0(2)                                                         |
| <i>Z</i>                                   | 4                                                                 | 2                                                                 |
| Density (calcd) (g/cm <sup>3</sup> )       | 1.357                                                             | 0.902                                                             |
| Abs. coeff (mm <sup>-1</sup> )             | 1.675                                                             | 0.056                                                             |
| <i>F</i> (000)                             | 1328                                                              | 396                                                               |
| Crystal size (mm <sup>3</sup> )            | 0.35 x 0.17 x 0.14                                                | 0.17 x 0.14 x 0.10                                                |
| Index ranges                               | -13 ≤ <i>h</i> ≤ 14<br>-22 ≤ <i>k</i> ≤ 22<br>-17 ≤ <i>l</i> ≤ 12 | -11 ≤ <i>h</i> ≤ 11<br>-19 ≤ <i>k</i> ≤ 18<br>-10 ≤ <i>l</i> ≤ 10 |
| Reflections collected                      | 20346                                                             | 11614                                                             |
| Independent reflections                    | 5509 [ <i>R</i> (int) = 0.0913]                                   | 2354 [ <i>R</i> (int) = 0.0651]                                   |
| Observed reflections                       | 3840                                                              | 1244                                                              |
| Data/restraints/params.                    | 5509 / 0 / 345                                                    | 2354 / 1 / 126                                                    |
| Goodness-of-fit on <i>F</i> <sup>2</sup>   | 0.873                                                             | 0.921                                                             |
| Extinction coef                            |                                                                   | 0.054(9)                                                          |
| Final <i>R</i> indices                     | <i>R</i> 1 = 0.0348<br>w <i>R</i> 2 = 0.0672                      | <i>R</i> 1 = 0.0678<br>w <i>R</i> 2 = 0.1809                      |
| Largest diff peak hole (eÅ <sup>-3</sup> ) | 0.332 and -0.529                                                  | 0.176 and -0.213                                                  |
